# Supplementary material for: Asperolide A, a Marine-Derived Tetranorditerpenoid, Induces G2/M Arrest in Human NCI-H460 Lung Carcinoma Cells, Is Mediated by p53-p21 Stabilization and Modulated by Ras/Raf/MEK/ERK Signaling Pathway
Source: MDPI journal article supplement (doi:10.3390/md11020316), 2013-01-29
Supplement: s1 [file s1]

marinedrugs-11-00316-s001.mol
  corina  05201404013D 1   1.00000     0.00000 
CORINA 3.49 0023  12.04.2013
 22 25  0  0  0  0  0  0  0  0999 V2000
   -0.0155    1.2955    0.0092 C   0  0  0  0  0  0  0  0  0  0  0  0
    0.0021   -0.0041    0.0020 C   0  0  0  0  0  0  0  0  0  0  0  0
    1.2040   -0.8723   -0.0504 C   0  0  0  0  0  0  0  0  0  0  0  0
    2.5239   -0.0730   -0.1100 C   0  0  0  0  0  0  0  0  0  0  0  0
    2.3156    1.2163    0.6972 C   0  0  0  0  0  0  0  0  0  0  0  0
    1.2776    2.0834    0.0010 C   0  0  0  0  0  0  0  0  0  0  0  0
    3.4583   -1.0005    0.6986 C   0  0  0  0  0  0  0  0  0  0  0  0
    4.6243   -0.2844    1.2830 C   0  0  0  0  0  0  0  0  0  0  0  0
    4.7439    1.0286    1.3574 C   0  0  0  0  0  0  0  0  0  0  0  0
    3.6322    1.8856    0.9027 C   0  0  0  0  0  0  0  0  0  0  0  0
    5.9727    1.7121    1.9037 C   0  0  0  0  0  0  0  0  0  0  0  0
    6.2178    2.8830    1.1134 O   0  0  0  0  0  0  0  0  0  0  0  0
    5.1769    3.7049    0.8730 C   0  0  0  0  0  0  0  0  0  0  0  0
    3.8638    3.1944    0.6927 C   0  0  0  0  0  0  0  0  0  0  0  0
    1.3521   -1.7488    1.1703 C   0  0  0  0  0  0  0  0  0  0  0  0
    2.5782   -1.5734    1.7066 O   0  0  0  0  0  0  0  0  0  0  0  0
    5.3653    4.9050    0.8098 O   0  0  0  0  0  0  0  0  0  0  0  0
    1.7708    0.8321    2.0743 C   0  0  0  0  0  0  0  0  0  0  0  0
    1.1078    3.3108    0.7128 O   0  0  0  0  0  0  0  0  0  0  0  0
    1.1137   -1.7768   -1.2811 C   0  0  0  0  0  0  0  0  0  0  0  0
    0.5032   -2.4930    1.6009 O   0  0  0  0  0  0  0  0  0  0  0  0
    2.8647    0.1154   -1.1280 H   0  0  0  0  0  0  0  0  0  0  0  0
  1  2  2  0      
  2  3  1  0      
  3  4  1  0      
  4  5  1  0      
  5  6  1  0      
  6  1  1  0      
  4  7  1  0      
  7  8  1  0      
  8  9  2  0      
  9 10  1  0      
 10  5  1  0      
  9 11  1  0      
 11 12  1  0      
 12 13  1  0      
 13 14  1  0      
 14 10  2  0      
 15 16  1  0      
 13 17  2  0      
  5 18  1  0      
  6 19  1  0      
  3 20  1  0      
 15 21  2  0      
  3 15  1  0      
  7 16  1  0      
  4 22  1  0      
M  END
$$$$
