# Supplementary material for: Asperolide A, a Marine-Derived Tetranorditerpenoid, Induces G2/M Arrest in Human NCI-H460 Lung Carcinoma Cells, Is Mediated by p53-p21 Stabilization and Modulated by Ras/Raf/MEK/ERK Signaling Pathway
Source: MDPI journal article supplement (doi:10.3390/md11020316), 2013-01-29
Supplement: s2 [file s2]

marinedrugs-11-00316-s001.mol
  ChemDraw04241410092D

 22 25  0  0  0  0  0  0  0  0999 V2000
   -1.7862    0.1369    0.0000 C   0  0  0  0  0  0  0  0  0  0  0  0
   -1.7862   -0.6881    0.0000 C   0  0  0  0  0  0  0  0  0  0  0  0
   -1.0717   -1.1006    0.0000 C   0  0  0  0  0  0  0  0  0  0  0  0
   -0.3572   -0.6881    0.0000 C   0  0  0  0  0  0  0  0  0  0  0  0
   -0.3572    0.1369    0.0000 C   0  0  0  0  0  0  0  0  0  0  0  0
   -1.0717    0.5494    0.0000 C   0  0  0  0  0  0  0  0  0  0  0  0
    0.3572   -1.1006    0.0000 C   0  0  0  0  0  0  0  0  0  0  0  0
    1.0717   -0.6881    0.0000 C   0  0  0  0  0  0  0  0  0  0  0  0
    1.0717    0.1369    0.0000 C   0  0  0  0  0  0  0  0  0  0  0  0
    0.3572    0.5494    0.0000 C   0  0  0  0  0  0  0  0  0  0  0  0
    1.7862    0.5494    0.0000 C   0  0  0  0  0  0  0  0  0  0  0  0
    1.7862    1.3744    0.0000 O   0  0  0  0  0  0  0  0  0  0  0  0
    1.0717    1.7869    0.0000 C   0  0  0  0  0  0  0  0  0  0  0  0
    0.3572    1.3744    0.0000 C   0  0  0  0  0  0  0  0  0  0  0  0
   -0.8582   -1.8975    0.0000 C   0  0  0  0  0  0  0  0  0  0  0  0
    0.1437   -1.8975    0.0000 O   0  0  0  0  0  0  0  0  0  0  0  0
    1.0717    2.6119    0.0000 O   0  0  0  0  0  0  0  0  0  0  0  0
   -0.3572    0.9619    0.0000 C   0  0  0  0  0  0  0  0  0  0  0  0
   -1.0717    1.3744    0.0000 O   0  0  0  0  0  0  0  0  0  0  0  0
   -1.7862   -1.5131    0.0000 C   0  0  0  0  0  0  0  0  0  0  0  0
   -1.2707   -2.6119    0.0000 O   0  0  0  0  0  0  0  0  0  0  0  0
   -0.3572   -1.5131    0.0000 H   0  0  0  0  0  0  0  0  0  0  0  0
  1  2  2  0      
  2  3  1  0      
  3  4  1  0      
  4  5  1  0      
  5  6  1  0      
  6  1  1  0      
  4  7  1  0      
  7  8  1  0      
  8  9  2  0      
  9 10  1  0      
 10  5  1  0      
  9 11  1  0      
 11 12  1  0      
 12 13  1  0      
 13 14  1  0      
 14 10  2  0      
 15 16  1  0      
 13 17  2  0      
  5 18  1  1      
  6 19  1  1      
  3 20  1  0      
 15 21  2  0      
  3 15  1  1      
  7 16  1  1      
  4 22  1  6      
M  END
